# Supplementary material for: Solving a problem with a single parameter: a smooth bcc to fcc phase transition for metallic lithium
Source: Royal Society of Chemistry journal article supplement (doi:10.1039/d2cc04928g), 2022-01-01
Supplement: d2cc04928g2.xlsx [file d2cc04928g2.xlsx]

## Sheet: Energies and TD corrections
VASP 5.4.4				1 eV =	96.487	kJ/mol
		PBE
ENCUT = 1000		Absolute values		0 K						100 K						200 K						300 K						400 K						450 K
EDIFF = 1E-07		A	E_0 / kJ/mol	∆E_therm,vib Li (6) / kJ/mol	∆E_therm,vib Li (7) / kJ/mol	T*∆S_vib Li (6) / kJ/mol	T*∆S_vib Li (7) / kJ/mol	T*∆S_ele / kJ/mol	∆E_therm,ele / kJ/mol	∆E_therm,vib Li (6) / kJ/mol	∆E_therm,vib Li (7) / kJ/mol	T*∆S_vib Li (6) / kJ/mol	T*∆S_vib Li (7) / kJ/mol	T*∆S_ele / kJ/mol	∆E_therm,ele / kJ/mol	∆E_therm,vib Li (6) / kJ/mol	∆E_therm,vib Li (7) / kJ/mol	T*∆S_vib Li (6) / kJ/mol	T*∆S_vib Li (7) / kJ/mol	T*∆S_ele / kJ/mol	∆E_therm,ele / kJ/mol	∆E_therm,vib Li (6) / kJ/mol	∆E_therm,vib Li (7) / kJ/mol	T*∆S_vib Li (6) / kJ/mol	T*∆S_vib Li (7) / kJ/mol	T*∆S_ele / kJ/mol	∆E_therm,ele / kJ/mol	∆E_therm,vib Li (6) / kJ/mol	∆E_therm,vib Li (7) / kJ/mol	T*∆S_vib Li (6) / kJ/mol	T*∆S_vib Li (7) / kJ/mol	T*∆S_ele / kJ/mol	∆E_therm,ele / kJ/mol	∆E_therm,vib Li (6) / kJ/mol	∆E_therm,vib Li (7) / kJ/mol	T*∆S_vib Li (6) / kJ/mol	T*∆S_vib Li (7) / kJ/mol	T*∆S_ele / kJ/mol	∆E_therm,ele / kJ/mol
ISMEAR = -5		0.333333	-182.919	4.19319	3.88214	0	0	0	0	4.59184	4.3349	0.595071	0.681969	0.0045291	0.000466032	6.16129	5.99237	3.2991	3.59841	0.0357455	0.0174603	8.2302	8.10982	7.45407	7.96328	0.0850977	0.0437954	10.4776	10.385	12.5218	13.2331	0.158291	0.0830386	11.6341	11.5512	15.3128	16.1234	0.203387	0.10694
SIGMA = 0.1		0.34	-183.047	4.20078	3.88916	0	0	0	0	4.59927	4.3418	0.595256	0.682174	0.00693066	0.00014473	6.17009	6.00086	3.30122	3.60088	0.0490405	0.0226542	8.24163	8.12104	7.4604	7.97028	0.100136	0.0448472	10.492	10.3993	12.5337	13.2459	0.172013	0.0785945	11.65	11.5671	15.3278	16.1395	0.21604	0.0998727
KSPACING = 0.075		0.35	-183.205	4.19119	3.88029	0	0	0	0	4.59266	4.33605	0.600467	0.68777	0.00671357	0.00037051	6.16839	5.99995	3.31848	3.61883	0.0495615	0.0232321	8.24394	8.12397	7.49121	8.00191	0.105767	0.0493724	10.4976	10.4054	12.5786	13.2918	0.180728	0.0840817	11.6572	11.5747	15.38	16.1927	0.225111	0.104662
		0.36	-183.332	4.19072	3.87985	0	0	0	0	4.59503	4.33864	0.604837	0.692553	0.00559625	0.000273058	6.17658	6.00841	3.33523	3.63649	0.0466775	0.0237107	8.25799	8.13825	7.52348	8.0355	0.10387	0.051773	10.5174	10.4253	12.6282	13.3431	0.178509	0.0867244	11.6797	11.5973	15.4387	16.2533	0.222524	0.107217
Phonons:		0.37	-183.438	4.20867	3.89647	0	0	0	0	4.61121	4.35363	0.599725	0.687453	0.00698759	0.00320819	6.19531	6.02642	3.32818	3.63014	0.0479811	0.0187822	8.28186	8.16163	7.5191	8.03245	0.0995553	0.0417123	10.5472	10.4548	12.6292	13.346	0.16934	0.0737556	11.7127	11.63	15.4431	16.2599	0.211814	0.0938799
6x6x6 supercell		0.38	-183.522	4.19461	3.88346	0	0	0	0	4.60238	4.34602	0.60925	0.697554	0.00731178	0.00192299	6.19282	6.02487	3.35622	3.65896	0.0469766	0.0183017	8.28386	8.16433	7.56666	8.0809	0.0921702	0.0364354	10.5528	10.4609	12.6967	13.4146	0.156731	0.0661553	11.7199	11.6377	15.5208	16.3387	0.197659	0.0863134
KPOINTS: 3 3 3		0.39	-183.589	4.17594	3.86617	0	0	0	0	4.59027	4.33531	0.622546	0.711377	0.00720565	0.00210149	6.18548	6.01851	3.38974	3.69293	0.0473761	0.0185332	8.27876	8.15994	7.61973	8.13432	0.0906949	0.0348665	10.5489	10.4576	12.7689	13.4871	0.150755	0.0611091	11.7164	11.6347	15.6025	16.4206	0.189625	0.0800379
		0.4	-183.641	4.16529	3.85631	0	0	0	0	4.584	4.32995	0.630322	0.719616	0.00868576	0.00259743	6.18435	6.01808	3.41256	3.7164	0.0526047	0.0191015	8.28136	8.16308	7.65855	8.17388	0.0955839	0.032904	10.5546	10.4637	12.8242	13.5432	0.152562	0.0550632	11.7235	11.6422	15.6662	16.4853	0.190018	0.0724521
Electronic temperature:		0.41	-183.683	4.16766	3.85851	0	0	0	0	4.58814	4.33408	0.632869	0.722472	0.0111587	0.0026312	6.19325	6.02709	3.42416	3.72879	0.0556653	0.0165109	8.29545	8.17727	7.68224	8.19878	0.0973872	0.0281617	10.5738	10.483	12.8617	13.5823	0.156479	0.0516891	11.7453	11.6641	15.7111	16.5319	0.195687	0.0702686
0.000008617 eV/K		0.42	-183.715	4.16586	3.85683	0	0	0	0	4.58895	4.33525	0.636404	0.726449	0.00821394	0.002774	6.20031	6.03455	3.43985	3.74545	0.0481885	0.0168351	8.30861	8.19077	7.71323	8.23112	0.0955298	0.0362926	10.5928	10.5022	12.9097	13.632	0.16457	0.0689641	11.7671	11.686	15.7681	16.5908	0.208399	0.0909371
ISMEAR= -1		0.43	-183.748	4.16376	3.85489	0	0	0	0	4.59027	4.33669	0.643408	0.733675	0.00459085	0.00135082	6.20366	6.03789	3.45679	3.76263	0.0437395	0.0221968	8.31349	8.19562	7.74049	8.25873	0.101371	0.0519303	10.5991	10.5086	12.9478	13.6706	0.180792	0.0918074	11.7742	11.6931	15.8117	16.635	0.228463	0.115479
(Fermi)		0.44	-183.768	4.17504	3.86533	0	0	0	0	4.60163	4.34723	0.644287	0.734572	0.00508004	0.000546116	6.21609	6.04969	3.45987	3.76602	0.0481567	0.0255816	8.32834	8.21	7.74802	8.26693	0.112172	0.0586921	10.617	10.5261	12.9613	13.6851	0.197016	0.100105	11.7937	11.7123	15.8287	16.6531	0.24686	0.123907
		0.45	-183.784	4.18113	3.87098	0	0	0	0	4.60731	4.35248	0.640765	0.731047	0.00959177	0.00459182	6.22196	6.05521	3.45305	3.75929	0.0571174	0.0193514	8.335	8.2164	7.73874	8.25788	0.120223	0.0481866	10.6248	10.5337	12.9502	13.6744	0.206542	0.088604	11.8021	11.7206	15.8168	16.6417	0.257703	0.112527
		0.46	-183.796	4.17006	3.86072	0	0	0	0	4.59777	4.34396	0.640236	0.730837	0.0101967	0.00276049	6.21576	6.04982	3.45676	3.76336	0.0622727	0.0234328	8.3306	8.2126	7.74654	8.26596	0.125146	0.0499311	10.6214	10.5308	12.9618	13.6862	0.212062	0.0895052	11.7991	11.718	15.8303	16.6554	0.264344	0.113839
		0.47	-183.805	4.15525	3.84702	0	0	0	0	4.58676	4.33416	0.646497	0.73751	0.00983685	0.00141064	6.20879	6.04376	3.4751	3.78211	0.0645527	0.0270106	8.32567	8.20835	7.77659	8.29634	0.131047	0.055535	10.6176	10.5275	13.0032	13.7279	0.221273	0.0962525	11.7957	11.7151	15.8773	16.7026	0.274903	0.120772
		0.48	-183.811	4.14381	3.83642	0	0	0	0	4.57937	4.32761	0.655822	0.747136	0.00567054	0.00381896	6.20416	6.03971	3.49775	3.80502	0.0379348	0.0137716	8.32229	8.20539	7.81212	8.33206	0.0891935	0.0407648	10.6149	10.5251	13.0514	13.7762	0.163745	0.0799935	11.7932	11.7128	15.9316	16.7571	0.209582	0.103953
		0.49	-183.814	4.14047	3.83333	0	0	0	0	4.57866	4.327	0.662399	0.753762	0.00615684	0.00370414	6.20314	6.03865	3.5106	3.81774	0.0426569	0.0161953	8.32044	8.20349	7.83039	8.35013	0.0935432	0.0408256	10.6122	10.5224	13.0747	13.7993	0.165188	0.0762778	11.7901	11.7097	15.9575	16.7827	0.209615	0.0987429
		0.5	-183.815	4.13206	3.82555	0	0	0	0	4.57203	4.32114	0.664152	0.755807	0.00651673	0.00504916	6.19986	6.03601	3.51884	3.82639	0.0452669	0.0159078	8.31942	8.20296	7.84554	8.3657	0.0957469	0.0390975	10.6129	10.5234	13.0969	13.8219	0.166204	0.0728834	11.7915	11.7114	15.9832	16.8088	0.210035	0.0946673
		0.51	-183.814	4.1452	3.83771	0	0	0	0	4.58374	4.33165	0.663547	0.754859	0.00730986	0.0032574	6.20767	6.04282	3.51211	3.81923	0.0449041	0.0158856	8.32501	8.20778	7.83268	8.35248	0.0943836	0.0384896	10.6172	10.5271	13.0782	13.8029	0.165392	0.0731661	11.7953	11.7147	15.9617	16.7871	0.209667	0.0954633
		0.52	-183.81	4.14956	3.84174	0	0	0	0	4.58479	4.33236	0.656929	0.74796	0.00478576	0.000488224	6.20569	6.04061	3.49457	3.80129	0.0399186	0.0197837	8.32065	8.20326	7.80346	8.32276	0.0907267	0.0455322	10.6107	10.5205	13.0368	13.7609	0.163916	0.0831506	11.7878	11.7071	15.914	16.7387	0.209244	0.106612
		0.53	-183.809	4.16498	3.85602	0	0	0	0	4.59584	4.34219	0.648634	0.739262	0.00280102	0.000772861	6.21291	6.04694	3.47245	3.7788	0.0355265	0.0204244	8.32608	8.20803	7.76804	8.28707	0.0881853	0.0494592	10.6152	10.5245	12.9885	13.7124	0.16334	0.0895052	11.792	11.7109	15.8594	16.6839	0.209549	0.113862
		0.54	-183.805	4.17061	3.86124	0	0	0	0	4.60034	4.3463	0.646778	0.737338	0.0055123	0.00200886	6.21712	6.05087	3.46825	3.77463	0.0338119	0.0130007	8.3307	8.21245	7.76222	8.28139	0.0856361	0.0422796	10.6205	10.5296	12.9815	13.7057	0.162815	0.0848034	11.7977	11.7164	15.852	16.6768	0.209825	0.109974
		0.55	-183.8	4.17478	3.8651	0	0	0	0	4.60481	4.3504	0.646848	0.737366	0.00497873	0.00360089	6.22102	6.05443	3.46758	3.77391	0.0350257	0.0132014	8.33445	8.21594	7.76102	8.28021	0.0874992	0.0424659	10.6244	10.5334	12.9801	13.7043	0.164601	0.084375	11.8018	11.7203	15.8505	16.6755	0.21144	0.109172
		0.56	-183.798	4.17687	3.86703	0	0	0	0	4.60585	4.35128	0.644952	0.735397	0.00686698	0.00301811	6.22152	6.05486	3.46298	3.76928	0.0445056	0.0166373	8.33478	8.21622	7.75391	8.27308	0.0956823	0.0408468	10.6247	10.5336	12.9705	13.6947	0.16961	0.0776643	11.802	11.7205	15.8397	16.6646	0.215113	0.100616
		0.57	-183.795	4.17935	3.86933	0	0	0	0	4.60603	4.35139	0.639219	0.72959	0.0091103	0.0044027	6.22135	6.0547	3.45095	3.75724	0.0496898	0.014886	8.33462	8.21607	7.73587	8.25504	0.100783	0.0368638	10.6245	10.5334	12.9465	13.6707	0.173514	0.0711698	11.8019	11.7204	15.8127	16.6376	0.21839	0.0930723
		0.58	-183.793	4.19318	3.88213	0	0	0	0	4.61578	4.36004	0.63144	0.721429	0.00905916	0.00350055	6.22746	6.06001	3.43014	3.73607	0.049686	0.0159184	8.33892	8.21979	7.70241	8.2213	0.102108	0.0390087	10.6278	10.5363	12.9007	13.6247	0.176314	0.0742004	11.8048	11.7229	15.7608	16.5855	0.221748	0.0962979
		0.59	-183.79	4.18553	3.87505	0	0	0	0	4.60947	4.35437	0.634219	0.724393	0.0083442	0.0021314	6.22325	6.05633	3.43867	3.74484	0.0502012	0.0189404	8.33591	8.21719	7.71671	8.23579	0.105147	0.0439025	10.6255	10.5343	12.9206	13.6447	0.182139	0.0806216	11.8028	11.7211	15.7834	16.6083	0.228686	0.103081
		0.6	-183.788	4.19535	3.88414	0	0	0	0	4.61577	4.35994	0.627176	0.717064	0.00613078	0.00332591	6.22701	6.0596	3.42089	3.72682	0.0488301	0.0213265	8.33853	8.21945	7.6886	8.20751	0.110677	0.0524281	10.6275	10.536	12.8824	13.6064	0.192709	0.091846	11.8045	11.7227	15.7403	16.565	0.240777	0.114489
		0.61	-183.786	4.19199	3.88103	0	0	0	0	4.61324	4.35767	0.629897	0.719862	0.00553546	0.00324968	6.22527	6.05805	3.42746	3.73347	0.0513494	0.0247624	8.33715	8.21821	7.69891	8.21787	0.12067	0.0608572	10.6263	10.5349	12.8963	13.6204	0.207481	0.10145	11.8033	11.7216	15.756	16.5807	0.256772	0.123499
		0.62	-183.783	4.20125	3.8896	0	0	0	0	4.619	4.36276	0.6216	0.711315	0.00836349	0.00251059	6.22885	6.06118	3.40768	3.7135	0.0619205	0.0273994	8.3398	8.22054	7.66809	8.18691	0.13416	0.0615722	10.6285	10.5368	12.8547	13.5786	0.223045	0.100037	11.8054	11.7234	15.709	16.5336	0.272782	0.120668
		0.63	-183.784	4.19551	3.88428	0	0	0	0	4.61375	4.35803	0.622372	0.712218	0.0116151	0.00648007	6.22525	6.05804	3.41155	3.71756	0.0712248	0.0242231	8.33721	8.2183	7.67513	8.19412	0.145088	0.0558573	10.6265	10.5351	12.8648	13.5888	0.23426	0.091406	11.8036	11.7218	15.7205	16.5453	0.283965	0.110683
		0.64	-183.782	4.18646	3.87591	0	0	0	0	4.60659	4.35164	0.625815	0.715918	0.013183	1.54379e-05	6.22071	6.05409	3.42219	3.72847	0.0796153	0.032793	8.33401	8.21554	7.69277	8.21197	0.150527	0.0586072	10.624	10.533	12.8892	13.6134	0.237934	0.0911088	11.8014	11.72	15.7483	16.5732	0.287331	0.109663
		0.65	-183.782	4.19518	3.88398	0	0	0	0	4.61298	4.35734	0.621093	0.710973	0.0135892	0.00692198	6.22484	6.05769	3.40952	3.71556	0.077617	0.0239365	8.33695	8.21808	7.67228	8.19129	0.146625	0.0490202	10.6263	10.5349	12.8611	13.5851	0.232988	0.0817689	11.8034	11.7217	15.7164	16.5412	0.282312	0.10084
		0.66	-183.785	4.19631	3.88503	0	0	0	0	4.61359	4.35785	0.621183	0.711006	0.0105962	0.00379387	6.22505	6.05786	3.4091	3.71512	0.0663802	0.0250972	8.33704	8.21814	7.6715	8.19049	0.135133	0.0545653	10.6263	10.535	12.8599	13.584	0.221506	0.0906273	11.8034	11.7217	15.7151	16.5399	0.270963	0.111175
		0.67	-183.785	4.1948	3.88363	0	0	0	0	4.611	4.35547	0.618409	0.708246	0.00981659	0.00359993	6.22308	6.05613	3.40436	3.71048	0.0607492	0.022548	8.33562	8.21692	7.66507	8.18415	0.124918	0.0506402	10.6252	10.534	12.8518	13.5759	0.208643	0.0873999	11.8025	11.7209	15.706	16.5309	0.257466	0.108869
		0.68	-183.791	4.20572	3.89374	0	0	0	0	4.6178	4.36146	0.609753	0.69927	0.00902636	0.00274409	6.22709	6.0596	3.38296	3.68883	0.0610357	0.0245704	8.3384	8.21931	7.63145	8.15034	0.120412	0.0485436	10.6274	10.5359	12.8062	13.5302	0.19884	0.0820699	11.8044	11.7225	15.6545	16.4792	0.245854	0.102995
		0.69	-183.795	4.20336	3.89156	0	0	0	0	4.61604	4.35987	0.611686	0.701253	0.00900031	0.00264857	6.22577	6.05842	3.38749	3.69339	0.0632057	0.025983	8.33722	8.21823	7.63841	8.15732	0.120053	0.046885	10.6262	10.5348	12.8155	13.5395	0.193431	0.0761408	11.8032	11.7214	15.6649	16.4896	0.238127	0.095525
		0.7	-183.799	4.20824	3.89608	0	0	0	0	4.61875	4.36223	0.606682	0.696092	0.00956572	9.45573e-05	6.22708	6.0595	3.37544	3.6812	0.0649734	0.0286962	8.33782	8.21867	7.61946	8.13824	0.121248	0.048341	10.6263	10.5348	12.7897	13.5135	0.191496	0.0745044	11.8031	11.7212	15.6357	16.4603	0.234276	0.092313
		0.71	-183.803	4.20742	3.89531	0	0	0	0	4.61685	4.36041	0.604376	0.693718	0.00986194	0.000275953	6.22443	6.05694	3.36977	3.67542	0.065752	0.0291844	8.33439	8.21531	7.61001	8.1286	0.122727	0.0490386	10.622	10.5305	12.7761	13.4997	0.191717	0.0736476	11.7984	11.7165	15.6199	16.4442	0.233417	0.0904131
		0.72	-183.805	4.21247	3.89999	0	0	0	0	4.62002	4.3632	0.600722	0.689913	0.0102845	0.000574098	6.22623	6.05848	3.36048	3.666	0.0665529	0.0282842	8.33552	8.21625	7.59524	8.11373	0.12428	0.0484056	10.6228	10.5311	12.7559	13.4794	0.193116	0.0724154	11.799	11.717	15.5971	16.4213	0.23458	0.0887941
		0.73	-183.812	4.2105	3.89817	0	0	0	0	4.61702	4.36045	0.597912	0.687126	0.0120339	0.00345906	6.2239	6.05642	3.35575	3.66137	0.0682346	0.0235245	8.33373	8.21468	7.58881	8.10739	0.125368	0.042516	10.6213	10.5298	12.7477	13.4713	0.194631	0.066605	11.7976	11.7158	15.588	16.4122	0.236693	0.0833706
		0.74	-183.818	4.21455	3.90192	0	0	0	0	4.61867	4.36179	0.592555	0.68158	0.0125616	0.00454068	6.22354	6.05585	3.34219	3.64757	0.0670073	0.0206386	8.33191	8.2127	7.56669	8.08496	0.123496	0.0396793	10.6182	10.5266	12.7168	13.44	0.194724	0.0660579	11.794	11.712	15.5525	16.3764	0.238485	0.0844136
		0.75	-183.825	4.21031	3.89799	0	0	0	0	4.61416	4.35757	0.592097	0.681076	0.00756748	6.85058e-05	6.21799	6.05049	3.33989	3.64504	0.058144	0.028016	8.32475	8.20568	7.5613	8.07916	0.116688	0.052377	10.6092	10.5178	12.7075	13.4301	0.192637	0.084841	11.784	11.7022	15.5411	16.3643	0.239319	0.106192
		0.76	-183.831	4.2066	3.89455	0	0	0	0	4.61156	4.35535	0.593481	0.682647	0.00466997	0.000440946	6.21747	6.05025	3.3456	3.651	0.0479203	0.0259299	8.32566	8.2068	7.57162	8.08977	0.108022	0.0558978	10.6113	10.52	12.7226	13.4455	0.190046	0.0961532	11.7866	11.7049	15.5587	16.3822	0.240158	0.121039
		0.77	-183.837	4.20902	3.89679	0	0	0	0	4.61399	4.35765	0.593152	0.682381	0.00347643	0.00106425	6.22087	6.05356	3.34628	3.65186	0.0414479	0.0231578	8.33022	8.21128	7.57404	8.09246	0.10263	0.0568366	10.6171	10.5257	12.7272	13.4506	0.190005	0.103305	11.793	11.7113	15.5645	16.3885	0.242998	0.130906
		0.78	-183.844	4.21656	3.90377	0	0	0	0	4.61929	4.36234	0.589502	0.678504	0.00309337	0.00149458	6.22397	6.05621	3.33581	3.64115	0.0389093	0.0219392	8.33214	8.21287	7.55687	8.07509	0.103011	0.0591157	10.6183	10.5266	12.7035	13.4266	0.194499	0.109021	11.7939	11.7119	15.5375	16.3613	0.249385	0.137873
		0.79	-183.853	4.21927	3.90629	0	0	0	0	4.62124	4.36411	0.587369	0.676339	0.00305574	0.00162774	6.22566	6.05776	3.33116	3.63649	0.0405535	0.0232997	8.33383	8.21446	7.54989	8.06814	0.109028	0.0633408	10.6201	10.5284	12.6943	13.4175	0.203653	0.114188	11.7959	11.7138	15.5273	16.3512	0.259683	0.143038
		0.8	-183.86	4.22095	3.90784	0	0	0	0	4.62201	4.36481	0.585773	0.674721	0.00340696	0.00107487	6.22667	6.05878	3.32822	3.63364	0.0469284	0.0276696	8.3354	8.21604	7.54616	8.06455	0.119642	0.0684894	10.6222	10.5305	12.69	13.4134	0.21658	0.11824	11.7983	11.7162	15.5228	16.3469	0.273299	0.146217
		0.81	-183.868	4.22723	3.91365	0	0	0	0	4.62572	4.36804	0.580951	0.669686	0.00513407	1.64028e-05	6.22862	6.06044	3.31599	3.62126	0.0577446	0.0328558	8.33662	8.21706	7.52691	8.04518	0.133799	0.0719011	10.6231	10.5312	12.6639	13.3872	0.231947	0.118591	11.799	11.7168	15.4932	16.3172	0.288926	0.145003
		0.82	-183.877	4.23051	3.91669	0	0	0	0	4.62735	4.36942	0.578024	0.666625	0.00917205	0.000133152	6.22916	6.06085	3.30854	3.61371	0.0721617	0.0355246	8.33667	8.21703	7.51513	8.03332	0.149576	0.0697003	10.6228	10.5309	12.6478	13.371	0.247328	0.111507	11.7986	11.7163	15.475	16.2989	0.304198	0.136005
		0.83	-183.884	4.23106	3.9172	0	0	0	0	4.62664	4.36867	0.575572	0.66408	0.0147432	0.00467576	6.22756	6.05927	3.30237	3.60742	0.0859998	0.0298463	8.33439	8.21477	7.50503	8.02306	0.161611	0.0569428	10.6198	10.5279	12.6336	13.3566	0.258637	0.0947001	11.7953	11.713	15.4586	16.2823	0.315696	0.118046
		0.84	-183.892	4.24096	3.92636	0	0	0	0	4.63291	4.37418	0.56858	0.656776	0.0148175	0.00425025	6.2311	6.0623	3.28439	3.5892	0.086216	0.0303124	8.33669	8.21671	7.47653	7.99436	0.162803	0.0581566	10.6214	10.5292	12.5947	13.3176	0.262129	0.0975802	11.7966	11.7141	15.4146	16.2381	0.320589	0.121834
		0.85	-183.898	4.23762	3.92328	0	0	0	0	4.62911	4.37064	0.567933	0.656112	0.00835674	0.000827858	6.22714	6.05858	3.28287	3.58763	0.0722948	0.037764	8.33229	8.2125	7.47373	7.99143	0.153183	0.0748179	10.6164	10.5243	12.5902	13.3129	0.257883	0.121647	11.7912	11.7088	15.4092	16.2324	0.318877	0.148787
		0.86	-183.907	4.23744	3.92311	0	0	0	0	4.62819	4.36974	0.566576	0.65471	0.00499899	0.000537433	6.22586	6.05736	3.27964	3.58437	0.0584981	0.0332726	8.33073	8.211	7.46855	7.98618	0.140492	0.0770391	10.6145	10.5225	12.583	13.3055	0.250007	0.131706	11.7891	11.7068	15.4009	16.224	0.313548	0.162171
		0.87	-183.912	4.23724	3.92292	0	0	0	0	4.63003	4.37175	0.569592	0.658038	0.00350248	0.000909872	6.23189	6.06355	3.29147	3.59683	0.0497352	0.0297981	8.34079	8.22119	7.49121	8.00975	0.131206	0.076848	10.6284	10.5366	12.6177	13.3414	0.243284	0.136437	11.805	11.7228	15.4419	16.2663	0.30847	0.169246
		0.88	-183.919	4.24506	3.93016	0	0	0	0	4.6366	4.37765	0.567691	0.65595	0.00286566	0.0012196	6.23662	6.06777	3.28502	3.5902	0.0453692	0.0278568	8.34475	8.22475	7.48054	7.99899	0.127238	0.0770526	10.6321	10.5399	12.6031	13.3268	0.240452	0.138771	11.8086	11.7261	15.4255	16.2499	0.306307	0.172544
		0.89	-183.927	4.24219	3.92751	0	0	0	0	4.63428	4.3756	0.568226	0.656578	0.00266111	0.00135275	6.23521	6.06655	3.2874	3.59267	0.0449099	0.0279803	8.34377	8.22391	7.48464	8.00315	0.128324	0.0785973	10.6314	10.5393	12.6089	13.3326	0.242097	0.140462	11.8079	11.7256	15.432	16.2565	0.307959	0.174046
		0.9	-183.933	4.24061	3.92605	0	0	0	0	4.63329	4.37475	0.568697	0.657118	0.00280102	0.00126784	6.23474	6.06615	3.28912	3.59443	0.0482213	0.0301956	8.34347	8.22365	7.48744	8.00597	0.133774	0.0811263	10.6311	10.5391	12.6127	13.3364	0.247609	0.141435	11.8078	11.7254	15.4364	16.2608	0.313043	0.173967
		0.91	-183.939	4.2488	3.93362	0	0	0	0	4.63854	4.37938	0.56222	0.650409	0.00359511	0.000791193	6.2379	6.06889	3.27313	3.57825	0.0553044	0.0340155	8.34567	8.22555	7.46227	7.98066	0.142696	0.0834391	10.6328	10.5406	12.5785	13.3021	0.255772	0.140491	11.8093	11.7267	15.3977	16.2221	0.320439	0.171337
		0.92	-183.945	4.24681	3.93178	0	0	0	0	4.63713	4.37813	0.563461	0.651706	0.00581334	0.000163063	6.23703	6.06813	3.27639	3.58155	0.0658514	0.0378866	8.34506	8.22503	7.46748	7.98591	0.153529	0.0831457	10.6324	10.5402	12.5856	13.3093	0.264927	0.135616	11.8088	11.7263	15.4058	16.2302	0.328634	0.164479
		0.93	-183.949	4.25092	3.93559	0	0	0	0	4.63997	4.38064	0.561099	0.649222	0.00998158	0.000203588	6.23875	6.06962	3.27003	3.5751	0.0771404	0.0379435	8.34626	8.22606	7.4573	7.97565	0.163634	0.0776064	10.6333	10.5409	12.5717	13.2953	0.273172	0.125567	11.8096	11.727	15.39	16.2144	0.336039	0.152669
		0.94	-183.951	4.25771	3.94187	0	0	0	0	4.64414	4.38431	0.555655	0.643574	0.011921	0.000919521	6.24117	6.07172	3.25658	3.56148	0.0839861	0.0379512	8.34793	8.22749	7.43618	7.95441	0.170346	0.0746713	10.6345	10.542	12.5431	13.2666	0.279024	0.119959	11.8108	11.728	15.3577	16.182	0.341494	0.145997
		0.95	-183.954	4.25703	3.94124	0	0	0	0	4.64298	4.38323	0.554955	0.642868	0.0113295	0.00124468	6.2402	6.07086	3.25542	3.56037	0.0855357	0.0397739	8.3472	8.22686	7.43474	7.95302	0.173052	0.0767554	10.634	10.5415	12.5414	13.2649	0.282086	0.121563	11.8103	11.7276	15.3558	16.1801	0.344643	0.147324
		0.96	-183.959	4.25769	3.94185	0	0	0	0	4.64407	4.38423	0.555999	0.643914	0.0108596	0.00107294	6.2411	6.07165	3.25727	3.56218	0.0855743	0.0427119	8.34787	8.22745	7.43724	7.95548	0.173324	0.0798864	10.6345	10.542	12.5445	13.268	0.282979	0.125157	11.8107	11.728	15.3593	16.1836	0.345868	0.151125
		0.97	-183.962	4.26259	3.94639	0	0	0	0	4.64747	4.38726	0.552903	0.640684	0.0121294	0.000777685	6.24323	6.07351	3.24923	3.55402	0.0862931	0.0405728	8.34938	8.22874	7.42441	7.94255	0.172734	0.0764544	10.6356	10.543	12.527	13.2504	0.282564	0.122071	11.8118	11.7289	15.3395	16.1637	0.345788	0.148403
		0.98	-183.965	4.26517	3.94878	0	0	0	0	4.64922	4.3888	0.551235	0.638944	0.013897	0.00207737	6.2443	6.07443	3.24492	3.54964	0.086654	0.0348579	8.35012	8.22939	7.41754	7.93563	0.171515	0.0693819	10.6362	10.5435	12.5176	13.241	0.2814	0.115421	11.8123	11.7293	15.3289	16.153	0.344936	0.142186
		0.99	-183.965	4.26311	3.94687	0	0	0	0	4.64786	4.38761	0.55262	0.64039	0.0150722	0.00524793	6.24349	6.07373	3.24849	3.55326	0.08605	0.0291912	8.34956	8.2289	7.4232	7.94133	0.169932	0.0632328	10.6358	10.5431	12.5253	13.2487	0.28008	0.10997	11.8119	11.729	15.3376	16.1618	0.343913	0.137171
		1	-183.967	4.27107	3.95424	0	0	0	0	4.65414	4.39321	0.549605	0.637157	0.0156926	0.00222306	6.24753	6.07725	3.23924	3.54378	0.0858329	0.0309154	8.35243	8.23138	7.40787	7.92581	0.169196	0.0646666	10.638	10.545	12.5041	13.2274	0.279492	0.111749	11.8139	11.7307	15.3135	16.1375	0.34346	0.139146
		Values relative to A=1 (fcc)		0 K						100 K						200 K						300 K						400 K						450 K
		A	∆E_0 / kJ/mol	∆E_therm,vib Li (6) / kJ/mol	∆∆E_therm,vib Li (7) / kJ/mol	∆(T*∆S_vib Li (6)) / kJ/mol	∆(T*∆S_vib Li (7)) / kJ/mol	∆(T*∆S_ele) / kJ/mol	∆∆E_therm,ele / kJ/mol	∆∆E_therm,vib Li (6) / kJ/mol	∆∆E_therm,vib Li (7) / kJ/mol	∆(T*∆S_vib Li (6)) / kJ/mol	∆(T*∆S_vib Li (7)) / kJ/mol	∆(T*∆S_ele) / kJ/mol	∆∆E_therm,ele / kJ/mol	∆∆E_therm,vib Li (6) / kJ/mol	∆∆E_therm,vib Li (7) / kJ/mol	∆(T*∆S_vib Li (6)) / kJ/mol	∆(T*∆S_vib Li (7)) / kJ/mol	∆(T*∆S_ele) / kJ/mol	∆∆E_therm,ele / kJ/mol	∆∆E_therm,vib Li (6) / kJ/mol	∆∆E_therm,vib Li (7) / kJ/mol	∆(T*∆S_vib Li (6)) / kJ/mol	∆(T*∆S_vib Li (7)) / kJ/mol	∆(T*∆S_ele) / kJ/mol	∆∆E_therm,ele / kJ/mol	∆∆E_therm,vib Li (6) / kJ/mol	∆∆E_therm,vib Li (7) / kJ/mol	∆(T*∆S_vib Li (6)) / kJ/mol	∆(T*∆S_vib Li (7)) / kJ/mol	∆(T*∆S_ele) / kJ/mol	∆∆E_therm,ele / kJ/mol	∆∆E_therm,vib Li (6) / kJ/mol	∆∆E_therm,vib Li (7) / kJ/mol	∆(T*∆S_vib Li (6)) / kJ/mol	∆(T*∆S_vib Li (7)) / kJ/mol	∆(T*∆S_ele) / kJ/mol	∆∆E_therm,ele / kJ/mol
		0.333333	1.04831	-0.0778824	-0.0721051	0	0	0	0	-0.0623004	-0.05831	0.0454653	0.0448118	-0.0111635	-0.00175703	-0.0862424	-0.0848811	0.0598617	0.0546302	-0.0500874	-0.0134551	-0.12222	-0.121559	0.0461994	0.037467	-0.0840981	-0.0208711	-0.160421	-0.160009	0.0176691	0.00573288	-0.121201	-0.0287107	-0.1798	-0.179456	-0.00066357	-0.0141641	-0.140073	-0.0322054
		0.34	0.920538	-0.0702968	-0.0650822	0	0	0	0	-0.0548758	-0.0514176	0.0456507	0.0450164	-0.00876198	-0.00207833	-0.0774379	-0.0763836	0.0619723	0.0571003	-0.0367924	-0.00826122	-0.110795	-0.110334	0.052528	0.0444677	-0.0690596	-0.0198194	-0.146002	-0.145739	0.0295462	0.0185674	-0.107479	-0.0331549	-0.163823	-0.16361	0.0143494	0.00194431	-0.12742	-0.0392731
		0.35	0.76233	-0.0798822	-0.0739565	0	0	0	0	-0.0614814	-0.0571629	0.050862	0.0506125	-0.00897908	-0.00185255	-0.0791358	-0.0773021	0.0792399	0.075047	-0.0362714	-0.00768326	-0.108483	-0.107408	0.0833435	0.0760998	-0.0634286	-0.0152942	-0.140353	-0.139597	0.0744881	0.0644556	-0.0987641	-0.0276676	-0.156652	-0.155995	0.0665221	0.055132	-0.118349	-0.0344835
		0.36	0.635001	-0.0803554	-0.0743946	0	0	0	0	-0.0591133	-0.0545728	0.0552319	0.0553954	-0.0100964	-0.00195	-0.0709522	-0.0688423	0.0959888	0.0927136	-0.0391554	-0.00720468	-0.094434	-0.0931251	0.115611	0.109693	-0.0653256	-0.0128936	-0.120633	-0.119686	0.12404	0.115727	-0.100983	-0.0250249	-0.134149	-0.133316	0.125219	0.115745	-0.120936	-0.0319285
		0.37	0.529868	-0.0624021	-0.0577731	0	0	0	0	-0.0429329	-0.0395804	0.0501201	0.0502962	-0.00870506	0.000985132	-0.0522218	-0.0508303	0.0889397	0.0863614	-0.0378519	-0.0121332	-0.0705669	-0.0697468	0.111231	0.106645	-0.0696405	-0.0229543	-0.0908092	-0.0902299	0.125043	0.118646	-0.110152	-0.0379937	-0.101206	-0.1007	0.129653	0.122378	-0.131646	-0.0452659
		0.38	0.445429	-0.0764582	-0.0707866	0	0	0	0	-0.0517607	-0.0471992	0.059645	0.0603969	-0.00838086	-0.000300075	-0.054707	-0.0523795	0.116975	0.115178	-0.0388563	-0.0126137	-0.0685697	-0.067046	0.15879	0.155089	-0.0770256	-0.0282311	-0.0852251	-0.0840931	0.192598	0.187206	-0.122761	-0.045594	-0.0940082	-0.0930049	0.207365	0.201162	-0.145801	-0.0528324
		0.39	0.378157	-0.0951346	-0.0880775	0	0	0	0	-0.0638691	-0.0579016	0.0729403	0.07422	-0.008487	-0.000121574	-0.0620447	-0.0587394	0.1505	0.149153	-0.0384568	-0.0123822	-0.0736698	-0.0714336	0.211859	0.208506	-0.0785009	-0.0298	-0.0890796	-0.0873945	0.264808	0.259694	-0.128737	-0.0506402	-0.0974289	-0.0959293	0.289061	0.283111	-0.153835	-0.0591079
		0.4	0.326102	-0.105781	-0.0979346	0	0	0	0	-0.0701378	-0.0632605	0.0807164	0.0824584	-0.00700689	0.00037437	-0.0631773	-0.0591679	0.173318	0.172616	-0.0332282	-0.0118139	-0.0710608	-0.0682949	0.250677	0.248076	-0.0736119	-0.0317626	-0.083401	-0.0812997	0.32011	0.315866	-0.12693	-0.0566861	-0.0903509	-0.0884763	0.35276	0.347745	-0.153442	-0.0666937
		0.41	0.284874	-0.103408	-0.0957371	0	0	0	0	-0.0659976	-0.05913	0.0832641	0.085315	-0.00453392	0.00040814	-0.0542764	-0.0501614	0.184915	0.185009	-0.0301676	-0.0144045	-0.0569785	-0.0541071	0.274375	0.272968	-0.0718085	-0.0365049	-0.0641716	-0.0619794	0.357631	0.354964	-0.123013	-0.0600603	-0.0685668	-0.0666085	0.39768	0.394431	-0.147773	-0.0688772
		0.42	0.252311	-0.105216	-0.0974109	0	0	0	0	-0.0651951	-0.057961	0.0867983	0.0892917	-0.00747871	0.000550941	-0.0472181	-0.0426948	0.200607	0.201669	-0.0376444	-0.0140803	-0.0438138	-0.0406112	0.305357	0.305309	-0.0736659	-0.0283739	-0.0452295	-0.0427699	0.405596	0.404667	-0.114922	-0.0427852	-0.0468135	-0.0446127	0.454621	0.453301	-0.135061	-0.0482088
		0.43	0.219797	-0.107312	-0.0993519	0	0	0	0	-0.0638766	-0.0565267	0.0938025	0.096518	-0.0111018	-0.000872242	-0.0438655	-0.0393567	0.217544	0.21885	-0.0420934	-0.00871857	-0.0389336	-0.03576	0.332625	0.332923	-0.0678246	-0.0127363	-0.0388528	-0.0364212	0.443675	0.443208	-0.0987004	-0.0199419	-0.0396864	-0.0375119	0.498255	0.497457	-0.114997	-0.0236673
		0.44	0.199391	-0.0960365	-0.0889125	0	0	0	0	-0.0525088	-0.0459852	0.0946819	0.097415	-0.0106126	-0.00167694	-0.0314392	-0.0275548	0.220626	0.222241	-0.0376762	-0.0053338	-0.0240883	-0.021376	0.340153	0.341116	-0.0570238	-0.00597448	-0.020969	-0.0188969	0.457198	0.457736	-0.0824761	-0.0116441	-0.0201623	-0.0183109	0.515207	0.515578	-0.0965999	-0.0152392
		0.45	0.183777	-0.0899371	-0.0832656	0	0	0	0	-0.046833	-0.0407332	0.09116	0.0938902	-0.00610087	0.00236876	-0.025568	-0.0220327	0.213804	0.215508	-0.0287155	-0.011564	-0.0174234	-0.0149754	0.330867	0.332069	-0.0489729	-0.01648	-0.0131806	-0.0113164	0.446103	0.447025	-0.07295	-0.0231453	-0.0117448	-0.0100806	0.503391	0.504216	-0.0857567	-0.0266188
		0.46	0.171878	-0.101015	-0.0935219	0	0	0	0	-0.056369	-0.0492552	0.0906308	0.0936796	-0.0054959	0.000537433	-0.0317665	-0.0274307	0.21752	0.219579	-0.0235602	-0.00748257	-0.0218291	-0.0187809	0.338667	0.340153	-0.0440502	-0.0147355	-0.0165642	-0.0142294	0.457694	0.458844	-0.0674299	-0.0222441	-0.0147719	-0.0126841	0.51681	0.517841	-0.0791155	-0.0253066
		0.47	0.162324	-0.115818	-0.107227	0	0	0	0	-0.0673789	-0.0590526	0.0968922	0.100352	-0.0058558	-0.000812421	-0.0387373	-0.0334922	0.235861	0.238327	-0.0212802	-0.00390483	-0.0267543	-0.0230324	0.36872	0.370527	-0.038149	-0.00913153	-0.0203398	-0.017479	0.499103	0.500509	-0.0582193	-0.0154968	-0.0181483	-0.0155877	0.563819	0.565082	-0.0685569	-0.018374
		0.48	0.156359	-0.127264	-0.117824	0	0	0	0	-0.0747677	-0.065602	0.106216	0.109979	-0.0100221	0.00159589	-0.0433718	-0.037536	0.258512	0.261235	-0.0478981	-0.0171438	-0.0301392	-0.0259873	0.404253	0.406246	-0.0800022	-0.0239018	-0.0230762	-0.0198819	0.547238	0.548779	-0.115747	-0.0317558	-0.0206748	-0.0178151	0.618194	0.619573	-0.133878	-0.0351927
		0.49	0.153223	-0.130606	-0.120917	0	0	0	0	-0.0754792	-0.0662148	0.112794	0.116605	-0.00953581	0.00148108	-0.0443907	-0.0385958	0.271358	0.27396	-0.043176	-0.0147201	-0.0319851	-0.0278844	0.42252	0.424317	-0.0756526	-0.023841	-0.0257609	-0.0226126	0.570627	0.571914	-0.114304	-0.0354715	-0.0237717	-0.0209548	0.64407	0.645166	-0.133845	-0.040403
		0.5	0.152622	-0.139008	-0.128696	0	0	0	0	-0.0821086	-0.072071	0.114546	0.11865	-0.00917591	0.0028261	-0.04767	-0.0412396	0.279598	0.282608	-0.040566	-0.0150076	-0.0330014	-0.0284185	0.437668	0.439888	-0.0734488	-0.0255691	-0.0251118	-0.0215836	0.592752	0.594484	-0.113288	-0.0388659	-0.0224121	-0.0192529	0.669714	0.671271	-0.133425	-0.0444786
		0.51	0.153745	-0.125874	-0.116537	0	0	0	0	-0.0704056	-0.0615669	0.113942	0.117702	-0.00838279	0.00103434	-0.0398551	-0.0344241	0.272871	0.275445	-0.0409288	-0.0150298	-0.0274195	-0.0235957	0.424807	0.426668	-0.0748122	-0.0261769	-0.0208248	-0.0178947	0.574096	0.575537	-0.1141	-0.0385832	-0.0185801	-0.0159599	0.648243	0.649535	-0.133793	-0.0436826
		0.52	0.157384	-0.121515	-0.112501	0	0	0	0	-0.0693488	-0.0608584	0.107324	0.110803	-0.0109069	-0.00173484	-0.0418417	-0.0366402	0.255326	0.257507	-0.0459143	-0.0111317	-0.031775	-0.0281151	0.395591	0.396947	-0.078469	-0.0191343	-0.0273074	-0.0245034	0.532691	0.533501	-0.115576	-0.0285987	-0.0260817	-0.0235743	0.600582	0.601178	-0.134216	-0.0325335
		0.53	0.158427	-0.106092	-0.0982222	0	0	0	0	-0.0583062	-0.0510233	0.0990292	0.102105	-0.0128916	-0.0014502	-0.0346226	-0.0303109	0.233205	0.235018	-0.0503064	-0.010491	-0.02635	-0.023347	0.360174	0.361265	-0.0810105	-0.0152073	-0.0227945	-0.0205028	0.484403	0.485028	-0.116152	-0.0222441	-0.021853	-0.0198059	0.545955	0.546399	-0.133911	-0.0252835
		0.54	0.161955	-0.10046	-0.0930077	0	0	0	0	-0.053799	-0.0469151	0.0971723	0.10018	-0.0101803	-0.000214201	-0.0304043	-0.0263733	0.229002	0.230848	-0.052021	-0.0179147	-0.0217259	-0.0189298	0.354347	0.355579	-0.0835597	-0.0223869	-0.0174859	-0.0153556	0.477415	0.478282	-0.116677	-0.0269459	-0.0161481	-0.0142461	0.538514	0.539247	-0.133634	-0.0291719
		0.55	0.166965	-0.0962901	-0.0891473	0	0	0	0	-0.0493284	-0.0428162	0.0972424	0.100209	-0.0107139	0.00137783	-0.0265061	-0.0228134	0.228333	0.230129	-0.0508072	-0.017714	-0.0179709	-0.0154359	0.353153	0.354403	-0.0816965	-0.0222007	-0.0135669	-0.0116435	0.476006	0.47696	-0.114891	-0.0273743	-0.0120821	-0.0103668	0.537084	0.537936	-0.13202	-0.0299737
		0.56	0.169559	-0.0942039	-0.0872159	0	0	0	0	-0.0482943	-0.0419296	0.095347	0.09824	-0.00882567	0.000795053	-0.0260094	-0.0223902	0.223739	0.225497	-0.0413273	-0.0142781	-0.0176489	-0.0151609	0.346043	0.347269	-0.0735134	-0.0238197	-0.0133284	-0.0114396	0.466429	0.467365	-0.109882	-0.034085	-0.0118709	-0.0101862	0.526281	0.527117	-0.128347	-0.0385302
		0.57	0.172308	-0.0917184	-0.0849147	0	0	0	0	-0.0481086	-0.0418291	0.0896137	0.0924322	-0.00658234	0.00217964	-0.026174	-0.0225472	0.211709	0.213462	-0.0361431	-0.0160294	-0.0178091	-0.0153035	0.328	0.329232	-0.0684131	-0.0278027	-0.0134623	-0.0115563	0.442402	0.443346	-0.105978	-0.0405795	-0.0119928	-0.0102918	0.499264	0.500107	-0.12507	-0.0460735
		0.58	0.174285	-0.0778894	-0.0721115	0	0	0	0	-0.0383628	-0.0331734	0.0818345	0.0842715	-0.00663348	0.00127749	-0.0200682	-0.0172406	0.190892	0.192285	-0.0361469	-0.014997	-0.0135038	-0.0115882	0.294537	0.295488	-0.0670874	-0.0256578	-0.0101652	-0.0087194	0.39661	0.39733	-0.103178	-0.0375489	-0.0090455	-0.0077581	0.447376	0.448017	-0.121712	-0.0428479
		0.59	0.177008	-0.0855384	-0.0791932	0	0	0	0	-0.044675	-0.0388394	0.0846137	0.0872356	-0.00734845	-9.16626e-05	-0.0242806	-0.0209141	0.199431	0.201059	-0.0356317	-0.011975	-0.0165137	-0.0141896	0.308837	0.30998	-0.064049	-0.020764	-0.0124808	-0.0107134	0.416485	0.41736	-0.0973535	-0.0311277	-0.0111179	-0.0095407	0.469994	0.470776	-0.114774	-0.0360649
		0.6	0.179575	-0.0757231	-0.070106	0	0	0	0	-0.0383702	-0.0332777	0.0775711	0.0799067	-0.00956186	0.00110285	-0.0205149	-0.0176517	0.181645	0.18304	-0.0370028	-0.00958888	-0.0138919	-0.0119302	0.280734	0.281703	-0.0585184	-0.0122384	-0.0104809	-0.0089935	0.37829	0.379029	-0.0867833	-0.0199033	-0.0093314	-0.0080052	0.426798	0.427457	-0.102683	-0.0246573
		0.61	0.181618	-0.0790834	-0.073217	0	0	0	0	-0.040903	-0.0355475	0.0802913	0.082705	-0.0101572	0.00102662	-0.0222617	-0.0191957	0.188217	0.189688	-0.0344835	-0.00615298	-0.0152799	-0.0131684	0.291041	0.292058	-0.0485262	-0.00380931	-0.0117115	-0.0101074	0.392218	0.392982	-0.0720111	-0.010299	-0.0105226	-0.0090916	0.442508	0.443185	-0.0866878	-0.0156473
		0.62	0.184685	-0.0698209	-0.0646415	0	0	0	0	-0.0351403	-0.0304534	0.0719951	0.0741581	-0.00732915	0.000287531	-0.0186779	-0.0160642	0.168441	0.169718	-0.0239124	-0.00351599	-0.0126266	-0.0108417	0.260216	0.261099	-0.0350354	-0.00309434	-0.0095221	-0.0081705	0.350576	0.351247	-0.0564468	-0.0117126	-0.0084775	-0.007273	0.395508	0.396106	-0.0706777	-0.0184782
		0.63	0.183872	-0.0755657	-0.0699602	0	0	0	0	-0.0403898	-0.0351869	0.0727665	0.075061	-0.00407754	0.00425701	-0.0222772	-0.0192078	0.172305	0.173778	-0.0146081	-0.00669234	-0.0152147	-0.0130803	0.267265	0.268312	-0.0241073	-0.00880926	-0.0115186	-0.0098909	0.360663	0.361467	-0.0452321	-0.0203433	-0.0102661	-0.0088125	0.407077	0.407797	-0.0594948	-0.0284627
		0.64	0.184951	-0.0846129	-0.0783363	0	0	0	0	-0.0475503	-0.0415694	0.0762097	0.0787607	-0.00250963	-0.00220762	-0.0268193	-0.0231548	0.18295	0.184692	-0.00621762	0.00187764	-0.018413	-0.0158395	0.284903	0.286159	-0.0186683	-0.00605938	-0.0139652	-0.0119955	0.385056	0.386027	-0.0415579	-0.0206405	-0.0124522	-0.0106914	0.434796	0.435666	-0.0561294	-0.0294826
		0.65	0.185135	-0.0758929	-0.0702632	0	0	0	0	-0.0411665	-0.0358739	0.071488	0.0738157	-0.00210342	0.00469892	-0.0226876	-0.0195559	0.170274	0.171781	-0.00821587	-0.0069789	-0.0154721	-0.0132985	0.264411	0.265478	-0.0225712	-0.0156463	-0.0117041	-0.0100483	0.356942	0.357761	-0.0465038	-0.0299804	-0.0104284	-0.0089502	0.402915	0.403648	-0.0611477	-0.0383063
		0.66	0.182712	-0.0747603	-0.0692146	0	0	0	0	-0.040557	-0.035365	0.0715781	0.0738484	-0.00509644	0.00157081	-0.022475	-0.0193844	0.169856	0.171337	-0.0194527	-0.00581817	-0.015383	-0.0132336	0.26363	0.264679	-0.0340628	-0.0101012	-0.0116824	-0.0100438	0.355822	0.356625	-0.0579858	-0.021122	-0.0104323	-0.0089691	0.401628	0.402345	-0.0724965	-0.0279706
		0.67	0.182352	-0.0762718	-0.070614	0	0	0	0	-0.0431433	-0.0377448	0.0688037	0.071089	-0.00587606	0.00137687	-0.0244507	-0.021116	0.165114	0.166695	-0.0250837	-0.00836735	-0.0168067	-0.0144599	0.257198	0.258342	-0.0442779	-0.0140263	-0.0127535	-0.010956	0.347656	0.348541	-0.0708485	-0.0243495	-0.0113738	-0.0097667	0.392578	0.393372	-0.085994	-0.0302767
		0.68	0.176908	-0.0653471	-0.0604996	0	0	0	0	-0.0363377	-0.0317525	0.0601476	0.0621122	-0.00666629	0.00052103	-0.0204392	-0.0176438	0.143721	0.145051	-0.0247972	-0.00634499	-0.0140245	-0.0120635	0.223578	0.224535	-0.0487838	-0.016123	-0.0106345	-0.0091342	0.302056	0.302796	-0.0806516	-0.0296794	-0.0094818	-0.0081408	0.341037	0.3417	-0.0976062	-0.0361508
		0.69	0.172877	-0.0677097	-0.062687	0	0	0	0	-0.0381048	-0.0333404	0.0620808	0.0640955	-0.00669234	0.000425508	-0.0217563	-0.0188289	0.148245	0.149611	-0.0226272	-0.00493242	-0.0152009	-0.0131434	0.230543	0.23151	-0.0491428	-0.0177816	-0.0118043	-0.0102292	0.311353	0.31208	-0.0860606	-0.0356085	-0.010674	-0.0092658	0.351473	0.352114	-0.105333	-0.0436208
		0.7	0.168683	-0.0628281	-0.0581675	0	0	0	0	-0.0353937	-0.0309813	0.0570772	0.058935	-0.00612692	-0.0021285	-0.0204518	-0.0177521	0.136193	0.137423	-0.0208595	-0.0022192	-0.014605	-0.0127089	0.211588	0.212434	-0.0479473	-0.0163256	-0.011674	-0.0102226	0.28554	0.286149	-0.0879961	-0.0372449	-0.0107321	-0.0094346	0.322233	0.322755	-0.109184	-0.0468329
		0.71	0.164444	-0.0636566	-0.0589345	0	0	0	0	-0.0372905	-0.0328026	0.0547705	0.0565606	-0.00583071	-0.00194711	-0.0230981	-0.0203124	0.130529	0.131644	-0.0200809	-0.00173098	-0.0180347	-0.0160698	0.202143	0.202795	-0.0464691	-0.015628	-0.0159591	-0.0144526	0.271963	0.272299	-0.0877752	-0.0381018	-0.0154614	-0.0141141	0.306488	0.306697	-0.110043	-0.0487327
		0.72	0.16219	-0.0586052	-0.0542578	0	0	0	0	-0.034125	-0.0300175	0.0511169	0.0527556	-0.0054081	-0.00164896	-0.0212975	-0.018772	0.121239	0.122222	-0.01928	-0.0026312	-0.0169043	-0.0151287	0.187376	0.187919	-0.0449157	-0.016261	-0.0152346	-0.0138751	0.251802	0.252041	-0.0863761	-0.0393339	-0.0148897	-0.0136742	0.283646	0.283762	-0.10888	-0.0503517
		0.73	0.155442	-0.060572	-0.0560787	0	0	0	0	-0.0371176	-0.0327661	0.0483071	0.0499686	-0.00365879	0.001236	-0.0236256	-0.0208289	0.116508	0.117594	-0.0175983	-0.0073909	-0.0186942	-0.0167017	0.180946	0.181576	-0.0438273	-0.0221505	-0.0167136	-0.0151802	0.243591	0.243897	-0.0848613	-0.0451443	-0.0162652	-0.0148923	0.274518	0.274692	-0.106767	-0.0557753
		0.74	0.149079	-0.056518	-0.0523255	0	0	0	0	-0.0354757	-0.031428	0.0429502	0.0444225	-0.003131	0.00231762	-0.0239871	-0.021402	0.102948	0.103786	-0.0188256	-0.0102768	-0.0205159	-0.018678	0.158817	0.159146	-0.0457001	-0.0249872	-0.0197819	-0.0183686	0.212647	0.212592	-0.0847677	-0.0456914	-0.019916	-0.0186509	0.239089	0.238869	-0.104975	-0.0547323
		0.75	0.142888	-0.0607664	-0.0562587	0	0	0	0	-0.0399808	-0.035643	0.0424916	0.0439183	-0.00812517	-0.00215455	-0.0295406	-0.0267602	0.100648	0.101262	-0.0276889	-0.00289943	-0.0276754	-0.0256981	0.153427	0.15335	-0.0525082	-0.0122895	-0.0287535	-0.027233	0.20338	0.202744	-0.0868547	-0.0269083	-0.0298317	-0.0284707	0.227662	0.226777	-0.104141	-0.0329542
		0.76	0.136319	-0.0644735	-0.0596909	0	0	0	0	-0.0425778	-0.0378671	0.0438758	0.0454897	-0.0110227	-0.00178211	-0.0300631	-0.0270021	0.106358	0.107223	-0.0379126	-0.00498548	-0.026763	-0.0245813	0.163755	0.16396	-0.0611737	-0.00876874	-0.0266924	-0.0250135	0.218477	0.218164	-0.0894463	-0.0155962	-0.0272507	-0.0257477	0.245197	0.244659	-0.103302	-0.0181068
		0.77	0.130345	-0.0620535	-0.0574503	0	0	0	0	-0.0401515	-0.0355594	0.0435465	0.0452241	-0.0122162	-0.00115881	-0.0266536	-0.0236827	0.107041	0.108075	-0.044385	-0.00775755	-0.0222081	-0.0200967	0.166168	0.166651	-0.0665654	-0.00782992	-0.0209134	-0.0192908	0.223102	0.223176	-0.0894869	-0.00844454	-0.0208427	-0.0193907	0.251067	0.25097	-0.100462	-0.00823999
		0.78	0.123017	-0.0545141	-0.0504702	0	0	0	0	-0.0348518	-0.0308717	0.0398971	0.0413472	-0.0125993	-0.000728477	-0.0235608	-0.0210378	0.096563	0.0973696	-0.0469236	-0.00897619	-0.0202889	-0.0185082	0.148997	0.149284	-0.0661843	-0.0055509	-0.0197241	-0.0183595	0.199358	0.199256	-0.0849925	-0.00272865	-0.019932	-0.0187118	0.22406	0.223792	-0.0940748	-0.00127266
		0.79	0.114807	-0.0518009	-0.0479583	0	0	0	0	-0.0329058	-0.0291008	0.0377634	0.0391816	-0.0126369	-0.000595325	-0.0218684	-0.0194829	0.0919177	0.0927118	-0.0452794	-0.00761572	-0.0185947	-0.0169185	0.142023	0.142333	-0.0601674	-0.00132573	-0.0178995	-0.0166174	0.190208	0.190161	-0.0758388	0.00243823	-0.0180159	-0.01687	0.213863	0.213666	-0.0837768	0.00389229
		0.8	0.107039	-0.0501239	-0.0464057	0	0	0	0	-0.0321289	-0.0284031	0.036168	0.0375637	-0.0122857	-0.0011482	-0.0208597	-0.0184718	0.0889806	0.0898548	-0.0389045	-0.00324582	-0.0170289	-0.0153393	0.138292	0.138736	-0.0495538	0.00382281	-0.0157501	-0.0144542	0.185905	0.186038	-0.0629124	0.00649068	-0.0155747	-0.0144156	0.209331	0.209336	-0.0701605	0.00707153
		0.81	0.0994868	-0.0438457	-0.0405932	0	0	0	0	-0.0284192	-0.0251724	0.0313452	0.032529	-0.0105586	-0.00220666	-0.018908	-0.0168089	0.0767511	0.0774755	-0.0280883	0.00194035	-0.0158083	-0.0143176	0.119038	0.119369	-0.0353963	0.0072346	-0.0149375	-0.0137923	0.159757	0.159796	-0.0475449	0.00684189	-0.0149097	-0.0138849	0.179759	0.179675	-0.0545335	0.00585676
		0.82	0.0907759	-0.0405593	-0.0375506	0	0	0	0	-0.0267946	-0.0237972	0.0284183	0.029468	-0.00652059	-0.00208991	-0.0183701	-0.0164012	0.0692968	0.0699274	-0.0136712	0.00460918	-0.0157522	-0.0143454	0.10726	0.107508	-0.0196197	0.00503373	-0.0152031	-0.0141196	0.14368	0.143635	-0.0321639	-0.000242182	-0.0153104	-0.0143401	0.161528	0.161357	-0.0392615	-0.00314065
		0.83	0.0832866	-0.0400159	-0.0370475	0	0	0	0	-0.0275026	-0.0245428	0.025967	0.026923	-0.000949432	0.0024527	-0.0199648	-0.0179822	0.0631221	0.063644	0.000166923	-0.00106908	-0.0180328	-0.0166072	0.0971617	0.0972536	-0.00758484	-0.00772378	-0.0181613	-0.0170605	0.129437	0.129181	-0.0208547	-0.0170493	-0.0186096	-0.0176232	0.145143	0.144734	-0.0277641	-0.0210998
		0.84	0.075311	-0.0301136	-0.0278798	0	0	0	0	-0.0212332	-0.0190383	0.0189745	0.0196189	-0.000875137	0.00202719	-0.0164302	-0.01495	0.045147	0.045419	0.000383053	-0.000603044	-0.015738	-0.0146699	0.0686572	0.0685545	-0.00639323	-0.00650998	-0.016574	-0.0157479	0.0906077	0.0901889	-0.0173628	-0.0141691	-0.0172785	-0.0165379	0.101188	0.100626	-0.0228713	-0.0173117
		0.85	0.0695961	-0.0334499	-0.0309686	0	0	0	0	-0.0250299	-0.0225699	0.0183273	0.0189546	-0.00733591	-0.0013952	-0.0203922	-0.018664	0.0436286	0.0438531	-0.0135381	0.00684865	-0.02014	-0.0188782	0.0658568	0.065616	-0.016013	0.0101514	-0.0216356	-0.0206555	0.0861189	0.0854701	-0.0216092	0.00989764	-0.0227175	-0.0218377	0.0957387	0.0949022	-0.024583	0.00964098
		0.86	0.0608901	-0.0336301	-0.0311354	0	0	0	0	-0.025957	-0.0234724	0.016971	0.0175522	-0.0106937	-0.00168563	-0.0216708	-0.0198862	0.0403999	0.0405844	-0.0273348	0.00235718	-0.0216916	-0.0203812	0.060683	0.0603733	-0.0287039	0.0123725	-0.0234988	-0.0224787	0.078863	0.0781122	-0.0294845	0.0199564	-0.0247472	-0.023831	0.0873994	0.0864443	-0.0299119	0.0230247
		0.87	0.05559	-0.0338316	-0.031322	0	0	0	0	-0.0241141	-0.0214651	0.019987	0.020881	-0.0121902	-0.00131319	-0.0156428	-0.0136941	0.0522278	0.0530475	-0.0360977	-0.00111732	-0.0116301	-0.0101916	0.0833393	0.0839381	-0.0379898	0.0121815	-0.0095497	-0.0084279	0.113548	0.113978	-0.0362077	0.0246881	-0.0088858	-0.0078778	0.128447	0.12881	-0.03499	0.0301001
		0.88	0.0485725	-0.0260099	-0.0240805	0	0	0	0	-0.0175423	-0.0155608	0.0180858	0.0187927	-0.012827	-0.00100346	-0.0109067	-0.0094749	0.0457744	0.0464219	-0.0404638	-0.00305864	-0.007678	-0.0066249	0.0726756	0.0731784	-0.0419574	0.012386	-0.0058784	-0.0050582	0.0989973	0.0993968	-0.0390396	0.0270221	-0.0052551	-0.0045184	0.112034	0.112395	-0.0371533	0.033398
		0.89	0.0407445	-0.0288809	-0.0267385	0	0	0	0	-0.0198577	-0.0176142	0.0186202	0.019421	-0.0130315	-0.000870313	-0.0123168	-0.0106965	0.0481521	0.0488868	-0.040923	-0.00293513	-0.0086593	-0.0074705	0.0767759	0.0773442	-0.0408719	0.0139308	-0.006627	-0.0057021	0.104736	0.105186	-0.0373945	0.0287126	-0.0059241	-0.0050936	0.118574	0.118981	-0.0355014	0.0349003
		0.9	0.034168	-0.0304581	-0.0281987	0	0	0	0	-0.0208514	-0.0184686	0.0190921	0.0199611	-0.0128916	-0.000955221	-0.0127876	-0.011096	0.0498741	0.0506467	-0.0376116	-0.000719793	-0.0089586	-0.0077253	0.0795739	0.0801654	-0.0354213	0.0164597	-0.0068464	-0.0058893	0.10856	0.109027	-0.0318832	0.0296862	-0.0061178	-0.005259	0.122903	0.123325	-0.0304166	0.0348212
		0.91	0.0282823	-0.0222737	-0.0206214	0	0	0	0	-0.0156056	-0.0138345	0.0126143	0.0132519	-0.0120975	-0.00143187	-0.0096256	-0.0083552	0.0338872	0.0344656	-0.0305285	0.00310013	-0.0067531	-0.0058244	0.0544032	0.054848	-0.0265002	0.0187725	-0.0051639	-0.0044425	0.0743892	0.074741	-0.0237204	0.0287415	-0.0046152	-0.0039678	0.0842707	0.084588	-0.0230208	0.032191
		0.92	0.0228848	-0.0242598	-0.0224602	0	0	0	0	-0.0170141	-0.0150852	0.0138557	0.0145487	-0.0098793	-0.00206	-0.0104993	-0.0091136	0.0371421	0.0377731	-0.0199815	0.00697119	-0.0073655	-0.0063526	0.0596105	0.0600958	-0.0156666	0.0184792	-0.0056318	-0.004845	0.0815006	0.0818844	-0.0145647	0.023867	-0.0050333	-0.0043271	0.0923241	0.0926701	-0.0148262	0.0253336
		0.93	0.0182438	-0.0201508	-0.018656	0	0	0	0	-0.0141766	-0.0125758	0.0114936	0.0120644	-0.00571107	-0.00201947	-0.0087832	-0.0076263	0.0307896	0.031315	-0.00869251	0.00702811	-0.0061696	-0.005322	0.0494344	0.04984	-0.00556151	0.0129399	-0.00472	-0.004061	0.0676014	0.0679226	-0.0063199	0.0138179	-0.004219	-0.0036275	0.0765837	0.0768735	-0.00742082	0.0135236
		0.94	0.0161992	-0.0133613	-0.0123701	0	0	0	0	-0.0099985	-0.0089038	0.00604968	0.00641653	-0.00377168	-0.00130354	-0.0063605	-0.0055324	0.0173334	0.0177039	-0.00184676	0.00703583	-0.0045	-0.0038853	0.0283119	0.028604	0.00115013	0.0100047	-0.0034524	-0.0029721	0.0389693	0.0392025	-0.000467962	0.00821008	-0.0030886	-0.0026568	0.044227	0.0444378	-0.00196641	0.00685154
		0.95	0.0136375	-0.014042	-0.0130004	0	0	0	0	-0.0111616	-0.009987	0.00535016	0.00571028	-0.00436314	-0.000978378	-0.0073251	-0.0063837	0.0161779	0.0165917	-0.00029718	0.00885847	-0.0052232	-0.0045139	0.0268762	0.0272109	0.00385659	0.0120889	-0.0040189	-0.0034616	0.0372373	0.0375068	0.00259357	0.00981369	-0.0035982	-0.0030964	0.0423389	0.0425831	0.00118293	0.00817824
		0.96	0.00800939	-0.0133833	-0.0123906	0	0	0	0	-0.0100766	-0.00898	0.00639392	0.00675665	-0.00483303	-0.00115013	-0.0064312	-0.0055943	0.0180258	0.0183999	-0.000258585	0.0117965	-0.0045512	-0.0039295	0.0293747	0.0296701	0.00412868	0.0152199	-0.0034918	-0.003006	0.0404002	0.040636	0.00348704	0.0134078	-0.0031238	-0.0026871	0.0458411	0.0460543	0.00240832	0.0119789
		0.97	0.00570238	-0.0084851	-0.0078557	0	0	0	0	-0.006669	-0.0059532	0.00329751	0.0035272	-0.00356326	-0.00144538	-0.0042999	-0.0037424	0.00999002	0.010238	0.000460243	0.00965738	-0.0030493	-0.0026333	0.0165385	0.0167358	0.00353818	0.0117878	-0.0023406	-0.0020149	0.0228767	0.0230348	0.00307215	0.0103212	-0.0020938	-0.0018009	0.0259984	0.0261414	0.00232823	0.00925696
		0.98	0.0019143	-0.0059025	-0.0054647	0	0	0	0	-0.0049262	-0.0044101	0.00163005	0.00178663	-0.00179562	-0.000145695	-0.0032329	-0.0028167	0.005675	0.00585836	0.000821104	0.00394246	-0.0023023	-0.0019892	0.00966789	0.00981588	0.00231955	0.00471532	-0.00177	-0.0015242	0.0135105	0.0136296	0.00190755	0.00367133	-0.0015841	-0.0013628	0.0153967	0.0155046	0.00147625	0.00304031
		0.99	0.00221438	-0.0079628	-0.0073721	0	0	0	0	-0.0062848	-0.0056087	0.00301483	0.00323296	-0.000620411	0.00302487	-0.0040414	-0.0035169	0.00924588	0.00947956	0.000217096	-0.00172422	-0.0028646	-0.0024739	0.0153308	0.0155162	0.000736196	-0.0014338	-0.0021995	-0.0018939	0.0212157	0.0213639	0.000587606	-0.00177922	-0.0019683	-0.0016935	0.0241133	0.0242472	0.000453489	-0.00197509
		1	0	0	0	0	0	0	0	0	0	0	0	0	0	0	0	0	0	0	0	0	0	0	0	0	0	0	0	0	0	0	0	0	0	0	0	0	0
		rel. value = E(A) – E(A=1)
		Values relative to A=1 (fcc)		0 K		100 K		200 K		300 K		400 K		450 K
		A	∆E_0 / kJ/mol	∆F Li (6) / kJ/mol	∆F Li (7) / kJ/mol	∆F Li (6) / kJ/mol	∆F Li (7) / kJ/mol	∆F Li (6) / kJ/mol	∆F Li (7) / kJ/mol	∆F Li (6) / kJ/mol	∆F Li (7) / kJ/mol	∆F Li (6) / kJ/mol	∆F Li (7) / kJ/mol	∆F Li (6) / kJ/mol	∆F Li (7) / kJ/mol
		0.333333	1.04831	0.970424	0.976201	0.949947	0.954591	0.938834	0.945427	0.943113	0.952507	0.962706	0.975054	0.977037	0.990882
		0.34	0.920538	0.850241	0.855456	0.826695	0.830788	0.809659	0.815585	0.806455	0.814976	0.819313	0.830556	0.830512	0.84313
		0.35	0.76233	0.682448	0.688374	0.657113	0.661681	0.632543	0.638569	0.618638	0.626957	0.618586	0.629374	0.623021	0.635069
		0.36	0.635001	0.554646	0.560607	0.528802	0.533179	0.500011	0.505396	0.477389	0.484615	0.466286	0.475547	0.46464	0.474947
		0.37	0.529868	0.467466	0.472095	0.446505	0.449682	0.414425	0.418395	0.394756	0.400162	0.386175	0.393151	0.385389	0.393169
		0.38	0.445429	0.368971	0.374643	0.342104	0.345914	0.299989	0.304114	0.266864	0.272089	0.244773	0.251297	0.237024	0.244231
		0.39	0.378157	0.283022	0.290079	0.249713	0.2544	0.191687	0.196339	0.141328	0.146918	0.102366	0.109165	0.0863934	0.0938434
		0.4	0.326102	0.22032	0.228167	0.182629	0.187764	0.111021	0.115732	0.046213	0.0515808	-0.0071656	-0.000820541	-0.0302608	-0.0233711
		0.41	0.284874	0.181466	0.189137	0.140554	0.145371	0.0614459	0.0654669	-0.0111756	-0.00689733	-0.0739756	-0.0691161	-0.102477	-0.0972695
		0.42	0.252311	0.147095	0.1549	0.108347	0.113088	0.0280496	0.0315107	-0.0515685	-0.048318	-0.126379	-0.122989	-0.162272	-0.158751
		0.43	0.219797	0.112485	0.120445	0.0723478	0.0769823	-0.00823714	-0.00503402	-0.0966728	-0.0937973	-0.183972	-0.181073	-0.226814	-0.223841
		0.44	0.199391	0.103355	0.110479	0.0611363	0.0649269	-0.0203316	-0.0180616	-0.113801	-0.112052	-0.207944	-0.20641	-0.254617	-0.253136
		0.45	0.183777	0.0938398	0.100511	0.0542535	0.0576231	-0.0384438	-0.0366126	-0.13202	-0.130774	-0.225702	-0.22476	-0.272221	-0.271382
		0.46	0.171878	0.0708629	0.0783562	0.0309116	0.0349766	-0.0613312	-0.0590537	-0.159304	-0.157742	-0.257194	-0.25601	-0.305895	-0.304839
		0.47	0.162324	0.0465055	0.0550969	0.00309619	0.00796228	-0.0948987	-0.0921198	-0.204133	-0.202218	-0.314396	-0.312942	-0.369461	-0.368163
		0.48	0.156359	0.0290951	0.0385355	-0.0130069	-0.00760409	-0.11477	-0.111657	-0.221933	-0.219774	-0.329964	-0.328311	-0.383824	-0.382344
		0.49	0.153223	0.0226177	0.032306	-0.0240328	-0.0185792	-0.134069	-0.130876	-0.24947	-0.247166	-0.364332	-0.362471	-0.421176	-0.419455
		0.5	0.152622	0.0136146	0.0239262	-0.0320307	-0.0260964	-0.149088	-0.145667	-0.270167	-0.267804	-0.390819	-0.389023	-0.450558	-0.448955
		0.51	0.153745	0.0278711	0.0372084	-0.0211854	-0.0161062	-0.133082	-0.130224	-0.249846	-0.247883	-0.365659	-0.36417	-0.422968	-0.421639
		0.52	0.157384	0.0358687	0.0448827	-0.0101168	-0.00510547	-0.105001	-0.101981	-0.210648	-0.208343	-0.315637	-0.313643	-0.367597	-0.365685
		0.53	0.158427	0.0523347	0.0602046	0.0125328	0.0167403	-0.069585	-0.0670866	-0.162294	-0.160382	-0.254862	-0.253196	-0.300753	-0.29915
		0.54	0.161955	0.0614956	0.0689477	0.0209503	0.024826	-0.0633445	-0.0611601	-0.152945	-0.151381	-0.243215	-0.241951	-0.288244	-0.287075
		0.55	0.166965	0.0706749	0.0778177	0.0324859	0.0360316	-0.0547814	-0.0528842	-0.144663	-0.143378	-0.235091	-0.234122	-0.280155	-0.279291
		0.56	0.169559	0.0753556	0.0823436	0.0355389	0.0390106	-0.0531399	-0.0512781	-0.144438	-0.143176	-0.2344	-0.233447	-0.278775	-0.277927
		0.57	0.172308	0.08059	0.0873937	0.0433481	0.046809	-0.0454609	-0.0435866	-0.13289	-0.131617	-0.218157	-0.217195	-0.259951	-0.259094
		0.58	0.174285	0.096396	0.102174	0.0619991	0.0647515	-0.015525	-0.0140899	-0.0923257	-0.0913607	-0.16686	-0.166134	-0.203272	-0.202626
		0.59	0.177008	0.0914699	0.0978151	0.0549764	0.05819	-0.0230464	-0.0213078	-0.105057	-0.103876	-0.185732	-0.18484	-0.225394	-0.224599
		0.6	0.179575	0.103852	0.109469	0.0742983	0.0770552	0.00482888	0.00629708	-0.0687714	-0.0677782	-0.142316	-0.141567	-0.178528	-0.177862
		0.61	0.181618	0.102535	0.108401	0.071608	0.0745498	-0.000529922	0.00106494	-0.0799858	-0.0788915	-0.160599	-0.159759	-0.200372	-0.199617
		0.62	0.184685	0.114864	0.120043	0.0851661	0.08769	0.0179621	0.0192985	-0.0562172	-0.0553146	-0.130679	-0.129998	-0.167101	-0.166495
		0.63	0.183872	0.108307	0.113912	0.0790507	0.081959	-0.00279365	-0.00119767	-0.0833098	-0.0822214	-0.163421	-0.162597	-0.202438	-0.201705
		0.64	0.184951	0.100338	0.106615	0.0614931	0.064923	-0.0167228	-0.0148002	-0.105756	-0.104439	-0.193153	-0.192154	-0.23565	-0.23476
		0.65	0.185135	0.109242	0.114872	0.0792833	0.0822481	-0.00658934	-0.0049643	-0.087823	-0.0867164	-0.166987	-0.16615	-0.205366	-0.204621
		0.66	0.182712	0.107951	0.113497	0.0772438	0.0801655	0.00401476	0.00562516	-0.0723402	-0.0712395	-0.147929	-0.147094	-0.184823	-0.184077
		0.67	0.182352	0.10608	0.111738	0.0776577	0.0807708	0.00950374	0.0112568	-0.0614013	-0.0601986	-0.131558	-0.130646	-0.165883	-0.16507
		0.68	0.176908	0.111561	0.116408	0.08761	0.0902305	0.0312002	0.0326653	-0.0280335	-0.02703	-0.08481	-0.0840496	-0.112156	-0.111478
		0.69	0.172877	0.105167	0.11019	0.079809	0.0825587	0.0205703	0.0221317	-0.0415063	-0.0404159	-0.0998284	-0.0989809	-0.127558	-0.126791
		0.7	0.168683	0.105855	0.110516	0.080211	0.0827655	0.0306789	0.0321487	-0.0258881	-0.0248374	-0.0777791	-0.0769366	-0.101931	-0.101155
		0.71	0.164444	0.100787	0.105509	0.0762664	0.0789642	0.0291667	0.0308372	-0.0248926	-0.0235802	-0.0738047	-0.0726342	-0.0961954	-0.095057
		0.72	0.16219	0.103585	0.107932	0.080707	0.0831759	0.0363023	0.0378442	-0.013436	-0.0122032	-0.0578049	-0.0566844	-0.0778176	-0.0767179
		0.73	0.155442	0.0948695	0.0993628	0.0749116	0.0776016	0.0255155	0.0272263	-0.022522	-0.0211598	-0.0651464	-0.0639189	-0.0843505	-0.0831511
		0.74	0.149079	0.0925612	0.0967537	0.0761019	0.0786773	0.0306931	0.0324401	-0.00954066	-0.00803195	-0.0442737	-0.0428048	-0.0596827	-0.0581976
		0.75	0.142888	0.0821212	0.0866289	0.0663858	0.069297	0.0374881	0.0396553	0.00200358	0.00405861	-0.029299	-0.0271429	-0.0434188	-0.0411732
		0.76	0.136319	0.0718453	0.0766279	0.0591057	0.0622025	0.0328246	0.0350211	-0.00179398	0.000182578	-0.035	-0.0330089	-0.050934	-0.048893
		0.77	0.130345	0.0682918	0.072895	0.0577047	0.0606192	0.0332778	0.0352151	0.00070439	0.00233276	-0.0326274	-0.0310795	-0.0493422	-0.0477931
		0.78	0.123017	0.068503	0.0725469	0.060139	0.062669	0.0408406	0.0425571	0.0143649	0.0158584	-0.0138013	-0.0123349	-0.0281727	-0.0266846
		0.79	0.114807	0.0630061	0.0668487	0.0561794	0.0585662	0.0386846	0.040276	0.0130306	0.0143976	-0.0150235	-0.0136946	-0.0294029	-0.0280595
		0.8	0.107039	0.0569149	0.0606331	0.0498794	0.0522095	0.0328573	0.0343709	0.00509412	0.00633996	-0.0252131	-0.0240504	-0.0406351	-0.0394805
		0.81	0.0994868	0.0556411	0.0588936	0.0480742	0.0501373	0.0338564	0.035231	0.00727155	0.00843108	-0.0208212	-0.0197152	-0.0347912	-0.0336825
		0.82	0.0907759	0.0502166	0.0532253	0.0399937	0.0419414	0.0213894	0.0227277	-0.00758238	-0.00642383	-0.0361856	-0.0350567	-0.049942	-0.0488002
		0.83	0.0832866	0.0432707	0.0462391	0.0332192	0.0352229	-0.00103632	0.000424435	-0.0320468	-0.0307132	-0.0605061	-0.0591498	-0.0738018	-0.0724064
		0.84	0.075311	0.0451974	0.0474312	0.0380056	0.0395561	0.0127477	0.0139559	-0.00920097	-0.00803018	-0.028677	-0.0274321	-0.0375963	-0.0362937
		0.85	0.0695961	0.0361462	0.0386275	0.0321796	0.0340123	0.025962	0.0274657	0.0097637	0.0112663	-0.00665158	-0.00502268	-0.0146362	-0.0129199
		0.86	0.0608901	0.02726	0.0297547	0.0269701	0.0288735	0.0285113	0.0301114	0.0195919	0.021212	0.00796911	0.00974001	0.00168012	0.0035514
		0.87	0.05559	0.0217584	0.024268	0.0223659	0.0241209	0.0226998	0.0238288	0.010792	0.0116316	-0.0066116	-0.00591984	-0.0166525	-0.0160074
		0.88	0.0485725	0.0225626	0.024492	0.024768	0.0260426	0.0292966	0.0300809	0.0225623	0.0231126	0.00975855	0.0101793	0.00183465	0.00221058
		0.89	0.0407445	0.0118636	0.014006	0.0144278	0.0158706	0.0182635	0.0191491	0.010112	0.0107325	-0.00451093	-0.00403663	-0.013352	-0.0129282
		0.9	0.034168	0.00370988	0.00596928	0.00616087	0.00767468	0.00839806	0.00931712	-0.00248345	-0.00184166	-0.0196686	-0.0191787	-0.0296155	-0.0291779
		0.91	0.0282823	0.00600857	0.00766087	0.010728	0.0118615	0.0183981	0.01909	0.0123986	0.0128825	0.00119108	0.00156068	-0.00539187	-0.00506172
		0.92	0.0228848	-0.00137501	0.000424587	-0.000165697	0.00107016	0.00219609	0.00295075	-0.00994544	-0.00941779	-0.0258159	-0.0254129	-0.0343128	-0.0339526
		0.93	0.0182438	-0.00190704	-0.000412238	-0.00373483	-0.00270485	-0.00560837	-0.00497695	-0.0188589	-0.0184168	-0.0339399	-0.033602	-0.0416145	-0.0413128
		0.94	0.0161992	0.0028379	0.0038291	0.00261916	0.00334701	0.00138792	0.00184554	-0.00775806	-0.0074355	-0.0175445	-0.0172974	-0.0222985	-0.0220775
		0.95	0.0136375	-0.000404527	0.000637073	0.000510477	0.00132496	-0.000709876	-0.000182256	-0.0102296	-0.00985503	-0.0203986	-0.0201108	-0.0253043	-0.0250468
		0.96	0.00800939	-0.00537391	-0.00438121	-0.00477823	-0.00404436	-0.00439253	-0.00392975	-0.0148253	-0.014499	-0.0259618	-0.0257118	-0.031385	-0.0311614
		0.97	0.00570238	-0.00278272	-0.00215332	-0.00214624	-0.00166013	0.000609603	0.000919143	-0.00563574	-0.00541711	-0.0122658	-0.0120982	-0.0154611	-0.0153112
		0.98	0.0019143	-0.0039882	-0.0035504	-0.00299202	-0.0026325	-0.00387224	-0.0036394	-0.00766012	-0.00749501	-0.0116024	-0.0114757	-0.0135025	-0.0133891
		0.99	0.00221438	-0.00574842	-0.00515772	-0.00343997	-0.002982	-0.0130142	-0.0127234	-0.018151	-0.0179457	-0.0235676	-0.0234102	-0.0262958	-0.0261549
		1	0	0	0	0	0	0	0	0	0	0	0	0	0

## Sheet: K-point convergence
VASP 5.4.4				1 eV =	96.487
		PBE
ENCUT = 1000		Absolute values	200 K
EDIFF = 1E-07		A	∆F(1 1 1) Li (6) / kJ/mol	∆F(2 2 2) Li (6) / kJ/mol	∆F(3 3 3) Li (6) / kJ/mol	∆(2 2 2 - 1 1 1) Li (6) / kJ/mol	∆F(3 3 3 - 2 2 2) Li (6) / kJ/mol
ISMEAR = -5		0.333333	2.64603	2.92615	2.86218	0.280118	-0.0639674
SIGMA = 0.1		0.34	2.66229	2.91096	2.86887	0.248667	-0.0420864
KSPACING = 0.075		0.36	2.64242	2.8479	2.84134	0.205478	-0.0065579
		0.38	2.62403	2.84849	2.8366	0.224456	-0.0118851
Phonons:		0.4	2.59282	2.80429	2.77179	0.21147	-0.0324987
6x6x6 supercell		0.42	2.55276	2.81933	2.76046	0.266567	-0.0588651
		0.44	2.43703	2.67482	2.75622	0.237794	0.0814002
KPOINTS:		0.46	2.3188	2.73205	2.759	0.41325	0.0269459
1 1 1		0.48	2.00987	2.62667	2.7064	0.616795	0.0797335
2 2 2		0.5	1.2619	2.34046	2.68102	1.07856	0.340557
3 3 3		0.52	2.16641	2.60799	2.71112	0.441581	0.103128
		0.54	2.43523	2.71484	2.74888	0.279603	0.0340423
		0.56	2.58912	2.75924	2.75854	0.170121	-0.0007068
		0.58	2.5395	2.69338	2.79732	0.153882	0.103941
		0.6	2.60825	2.79104	2.80613	0.182791	0.0150894
		0.62	2.67096	2.83148	2.82117	0.160514	-0.0103126
		0.64	2.70852	2.79875	2.79852	0.090237	-0.0002384
		0.66	2.61235	2.76883	2.81595	0.156481	0.0471227
		0.68	2.76206	2.88502	2.84413	0.122968	-0.0408989
		0.7	2.8217	2.91486	2.85164	0.0931636	-0.0632213
		0.72	2.93668	2.91052	2.86575	-0.0261631	-0.044767
		0.74	2.95178	2.89529	2.88135	-0.0564866	-0.0139418
		0.76	2.94977	2.86262	2.87186	-0.0871533	0.0092466
		0.78	2.9634	2.91827	2.88816	-0.0451299	-0.0301049
		0.8	2.97564	2.91562	2.89844	-0.0600241	-0.0171737
		0.82	2.98654	2.9443	2.92062	-0.0422456	-0.0236804
		0.84	3.00542	2.96851	2.94671	-0.0369095	-0.0217994
		0.86	2.95907	3.00069	2.94621	0.0416149	-0.0544709
		0.88	2.7084	3.004	2.9516	0.295594	-0.0523939
		0.9	2.72895	2.99753	2.94562	0.268582	-0.0519111
		0.92	2.74921	3.00251	2.96064	0.253294	-0.0418637
		0.94	2.73058	2.96381	2.98459	0.233226	0.0207813
		0.96	2.71562	2.95718	2.98383	0.241561	0.0266498
		0.98	2.66327	2.93974	2.99938	0.276468	0.0596423
		1	2.4613	2.84121	3.00829	0.379916	0.167073
		1.02	2.62795	2.89756	2.99508	0.269618	0.0975215
		1.04	2.59809	2.93602	2.99686	0.337922	0.060849
		1.06	2.62927	2.96344	2.99617	0.334169	0.0327297
		1.08	2.70022	2.98081	2.9905	0.28059	0.0096887
		1.1	2.72412	2.99307	2.95503	0.268946	-0.0380375
